# Supplementary material
Source: PubMed Central journal article supplement (PMC1569956)
Supplement: bmj_38933.585764.AE_1.pdf [file bmj_38933.585764.AE_1.pdf]

**Study group members**

The additional investigators of the Dubbo Infection Outcomes Study Group are (in alphabetical order): Dr Heather Dunckley (Australian Red Cross Blood Service, Sydney), Associate Professor Andrew Geczy (Australian Red Cross Blood Service, Sydney), Dr Ray Harris (University of South Australia, Adelaide), Dr Rajiv Khanna (Queensland Institute for Medical Research, Brisbane), Professor Barrie Marmion (Institute for Medical and Veterinary Science, Adelaide), and Professor Bill Rawlinson (Prince of Wales Hospital, Sydney).
